# Supplementary material for: Solid bromine complexing agents: long-term solution for corrosive conditions in redox-flow battery
Source: Royal Society of Chemistry journal article supplement (doi:10.1039/d4ya00367e), 2024-12-12
Supplement: d4ya00367e1.pdf [file d4ya00367e1.pdf]

*Supporting information*

## Solid Bromine Complexing Agents: Long-term Solution for Corrosive Conditions in Redox-Flow Battery

Kobby Saadi<sup>1</sup>, Raphael Flack<sup>1</sup>, Valery Bourbo<sup>2</sup>, Ran Elazari<sup>2</sup>, David Zitoun<sup>1</sup>

<sup>1</sup>Department of Chemistry and Bar-Ilan Institute of Nanotechnology and Advanced Materials, Bar-Ilan University, Ramat Gan 529002, Israel

<sup>2</sup>R&D, ICL Industrial products, Beer Sheva 8410101, Israel

### **Flow battery structure:**

The MEA was made of two 7 cm<sup>2</sup> electrodes which were hot pressed to the membrane. The MEA was placed between the channelled graphite plates. Serpentine channel was used for the hydrogen side and interdigitated was used for the bromine side. Two copper plates were used to tight the cell and to serve as current collectors, as shown at figure 1S.

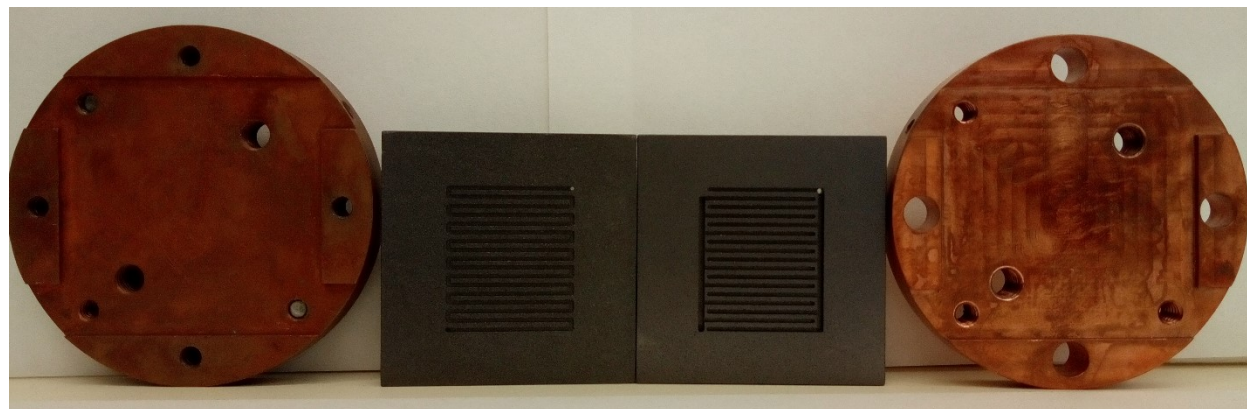

**Figure 1S:** RFB cell's components: copper plates current collectors and graphite plates with flow channels.

### **Electrochemical impedance spectroscopy (EIS):**

EIS was measured after every charge-discharge cycle. The EIS was measured with 10mV amplitude around the OCV and frequency range from 1Hz to 8kHz. The results are shown in figure 2S and table 1S.

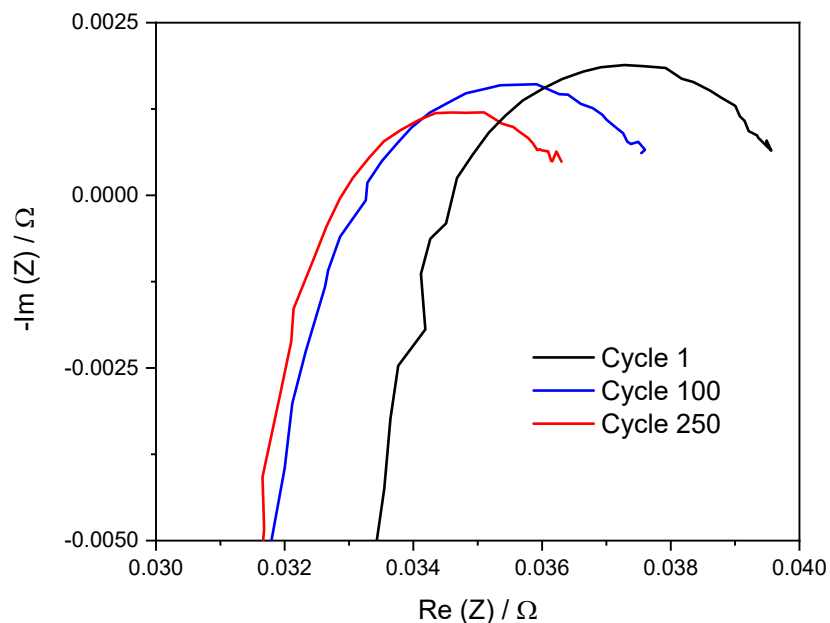

**Figure 2S:** EIS evolution along cycling.

| Cycle | $R_s$ | $R_{CT}$ |
|-------|-------|----------|
| 1     | 34.6  | 5.3      |
| 100   | 33.3  | 4.6      |
| 250   | 33    | 3.4      |

**Table 1S:** EIS measurements along cycling after SBCA addition to the RFB

The EIS measurement is analyzed by the elliptical fitting approach, by selecting the semicircle points of the Nyquist plot and applying circular fit.<sup>1</sup>

| SOC | HBr[M] | Br <sub>2</sub> [M] | BCA[M] | TOC ppm |
|-----|--------|---------------------|--------|---------|
|     |        |                     |        |         |

## Supporting information

|     |     |      |     |     |
|-----|-----|------|-----|-----|
| 100 | 1.1 | 3.30 | 1.1 | 49  |
| 67  | 3.3 | 2.20 | 1.1 | 32  |
| 32  | 5.5 | 1.10 | 1.1 | 50  |
| 16  | 6.6 | 0.55 | 1.1 | 193 |
| 0   | 7.7 | 0.00 | 1.1 | 125 |

Table S2: Organic residues contents (TOC) in the electrolyte containing SBCA after 1 year soaking for different states of charge

### **Efficiencies calculations:**

The efficiencies are calculated by the following equations:

$$\text{Eq. (1)} \quad \text{Coulombic Eff.} = (Q_{\text{disch}} / Q_{\text{ch}}) * 100$$

$$\text{Eq. (2)} \quad \text{Energy Eff.} = (E_{\text{disch}} / E_{\text{ch}}) * 100$$

1. Pfeiffer N, Wachter T, Frickel J, Hofmann C, Errachid A, Heuberger A. Elliptical fitting as an alternative approach to complex nonlinear least squares regression for modeling electrochemical impedance spectroscopy. *BIOSIGNALS 2021 - 14th Int Conf Bio-Inspired Syst Signal Process Part 14th Int Jt Conf Biomed Eng Syst Technol BIOSTEC 2021*. 2021;(September):42-49. doi:10.5220/0010231600420049
